# Supplementary material for: Down-regulation of circular RNA C3 in hepatocellular carcinoma and its potential clinical implication
Source: Research Square preprint supplement (doi:10.21203/rs.3.rs-1638323/v1), 2022-05-18
Supplement: Supplementary file 1 [file 2d6c21d8b344369c24095be9.xlsx]

## Sheet: Sheet2
Characteristics	Patient number	CircPTGR1	P-value
		Mean ± SD
Gender
Male	112	0.132±0.260	0.3996
Female	9	0.063±0.071
Age
< 55	59	0.093±0.152	0.1427
≥55	62	0.157±0.313
Alcoholism
Negative	87	0.136±0.286	0.539
Positive	37	0.106±0.142
TNM stage
I+II	88	0.125±0.171	0.0001
III+IV	33	0.042±0.063
Invasion (T stage)
I	74	0.139±0.181	0.0001
II-IV	47	0.043±0.056
Tumor number
1	93	0.136±0.226	0.026
>1	28	0.043±0.042
Tumor Size
< 5.0	39	0.131±0.175	0.024
≥5.0	82	0.073±0.112
