# Supplementary material for: Down-regulation of circular RNA C3 in hepatocellular carcinoma and its potential clinical implication
Source: Research Square preprint supplement (doi:10.21203/rs.3.rs-1638323/v1), 2022-05-18
Supplement: Supplementary file 2 [file 95097e98fb53c1ab00debf0c.xlsx]

## Sheet: Sheet1
	Sensitivity (%)	Specificity (%)	AUC	95% CI	P-value
C3	75.76	81.48	0.856	0.812-0.90	<0.001
SOX5	80.59	78.03	0.8521	0.806-0.898	<0.001
C3+SOX5	76.52	90.16	0.907	0.872-0.943	<0.001
